# Supplementary material
Source: publisher figshare collection journal article supplement (https://acs.figshare.com/ndownloader/files/4230826)
Supplement: Supplementary file 1 [file 4230826]

## **Supporting Information**

### **Effect of Radial Directional Dependences and Rainwater Influence on CVOC Concentrations in Tree Core and Birch Sap Samples Taken for Phytoscreening using HS-SPME-GC/MS**

Olaf Holm <sup>1</sup>, Wolfgang Rotard <sup>1</sup>

<sup>1</sup> Department of Environmental Engineering, Technische Universität Berlin, Germany.

To whom correspondence should be sent:

Wolfgang Rotard, Department of Environmental Engineering, Chair of Environmental Chemistry,  
Technische Universität Berlin, Germany, Strasse des 17. Juni 135, D-10623 Berlin

Phone: +49 30 314-25220/- 21978, Fax: +49 30 314-29319, email: wolfgang.rotard@tu-berlin.de

**Site Description.** The former military base Potsdam-Krampnitz lies south of the nature reserve “Döberitzer Heide” to the west of the German City of Berlin on the main B2 road on high ground of morphologically insular form. The site is bordered on the south east by Krampnitzer lake, on the south west by meadowland leading out to the Fahrlander lake and to the north by the lowland of the “Großen Luch”, which drains via the “Großen Graben” into the Krampnitzer lake. Agricultural land lies to the west. Owing to the morphological high ground character, the site shows no particular direction of groundwater flow.

Two sections were available for its geological characterization. The first geological section begins to the southwest of tree 09, passes north of the dry cleaning building and the storage tanks and ends near groundwater well 19 in the east. The second section extends to the border with the wetland, passes tree 07, and the ground water wells 21, 22 and 23. Based on these two sections the subsurface of the contamination area (see Fig. S1 and S3) can be described as followed. The section 1 showed a nearly constant aquifuge between 30 and 31 m NHN. The ground level is affected of earthworks and varying about two meters from the west to the east. The aquifer had an average thickness of 4 meters where the earthwork is between 0.5 and 2.5 m thick. To the ground water well 19 the aquifer becomes abrupt narrow and is only one meter thick. The section 2 showed the same aquifuge in the western part at 31 m NHN but the ground level is only 4 meter above. Aquifer and earthwork are both 2 meters in thickness. The eastern part of the section is influenced by the wetland and showed a peat clay nearby ground water well 22. The aquifer subsided here until 28 m NHN with 0.5 m thickness and is ending before ground water well 23. Overall the geology on the base is predominantly simple with a fixed top of the aquifuge. The ground level is varying a lot but for the ground water flow this might be not so important. In the north east of the base the geology is more complex and it is suggested that the situation in the wetlands is complex as well.

A dry cleaning plant in the north west area of the base has caused considerable ground water contamination, which (as a result of the locally uniform groundwater flow) flows into the bordering wetlands. This site is dominated by two tree species: in the wetland almost exclusively by white willow (*Salix alba*), and on the base by white birch (*Betula alba*).

There are also solitary poplars (*Populus*) outside the wetland area, oaks (*Quercus*), limes (*Tilia*) and other tree species. Because the former buildings have long been in a state of serious dilapidation, these trees are also partly to be found within the ruins of buildings without basements.

The contaminant plume of the volatile chlorinated hydrocarbons (CVOC) was already known before the start of the described investigation. Based on direct-push groundwater screening, the concentrations of CVOC reached a maximum of 122 mg CVOC/L in the outflow from the contamination source at the location of the dry cleaning plant (see Figure S2). In the ground water well 22 (see Table S2) the reached concentrations of 174 mg CVOC/L. Main components are trichloroethene (TCE) near the source, and both TCE and cis-1,2-dichloroethene (cDCE) in the plume. Also detected in relevant concentrations were chloroethene (vinylchloride, VC), 1,1-dichloroethene (1,1-DCE), and trans-1,2-dichloroethene (tDCE).

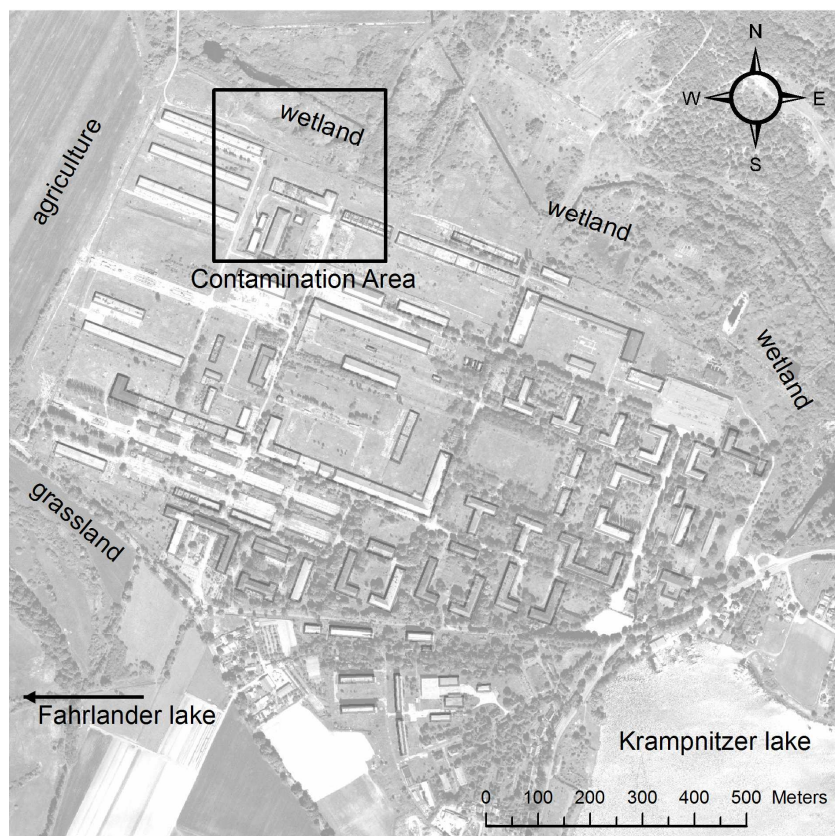

FIGURE S1: Former military base Potsdam-Krampnitz

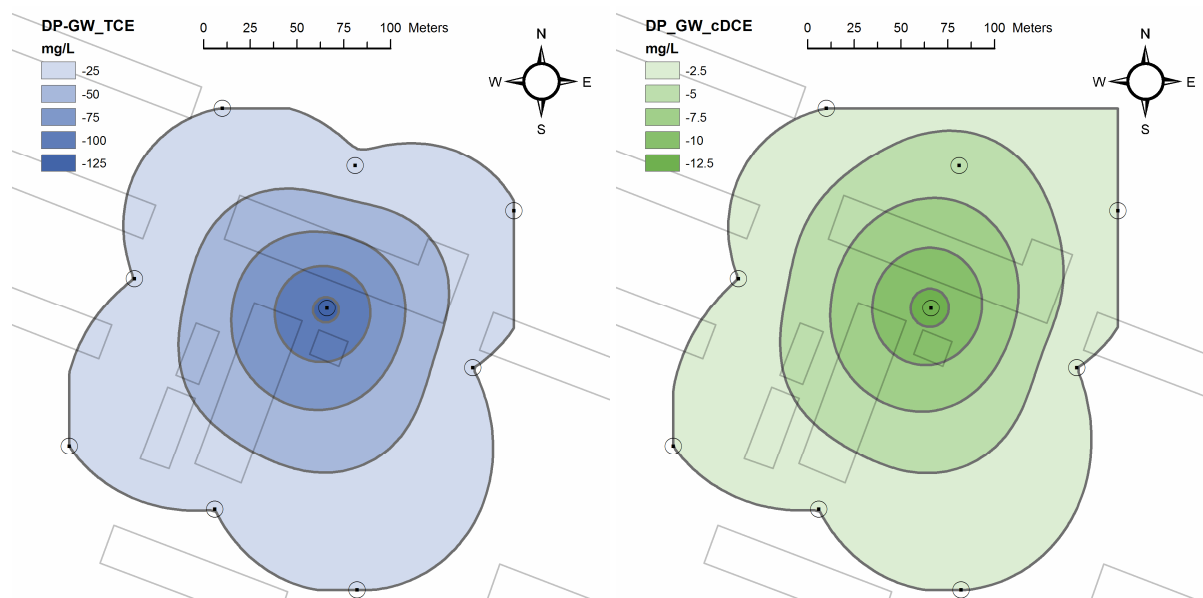

FIGURE S2: Interpolated (in kriging mode) TCE (left) and cDCE (right) concentrations based on direct push ground water samples in month of August 2007; the circles depicts the points for direct push

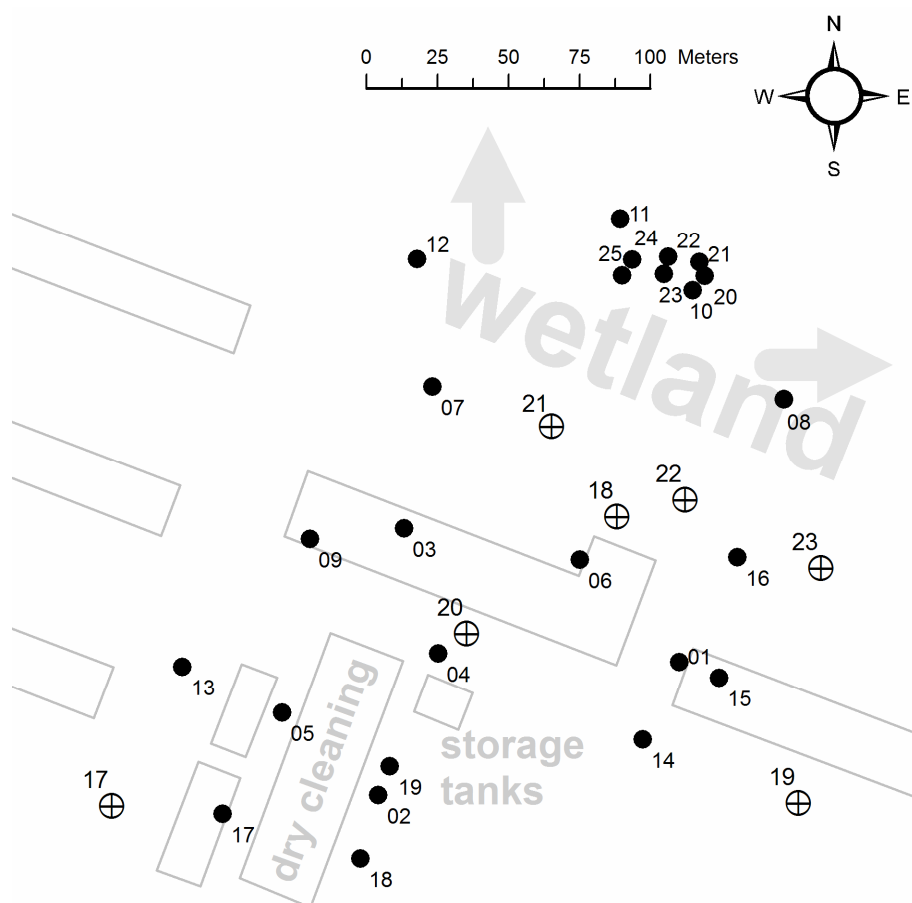

FIGURE S3: Contamination area and tree locations (solid points) with labels and ground water wells (circles with crosses) with labels.

TABLE S1: Ground water levels in the contamination area for the month March 2007 until September 2008

| Well - Label | Ground Water Level in m Below Ground Level |         |         |         |         |         |         |
|--------------|--------------------------------------------|---------|---------|---------|---------|---------|---------|
|              | 03/2007                                    | 06/2007 | 09/2007 | 12/2007 | 03/2008 | 07/2008 | 09/2008 |
| B17          | 4.45                                       | 4.06    | 3.72    | 3.83    | 3.74    | 3.79    | 4.27    |
| B18          | 1.70                                       | 1.60    | 1.49    | 1.37    | 1.32    | 1.86    | 2.16    |
| B19          | 1.15                                       | 1.04    | 1.04    | 0.87    | 0.85    | 1.67    | 2.13    |
| B20          | 1.94                                       | 1.68    | 1.52    | 1.44    | 1.32    | 1.82    | 2.20    |
| B21          | 2.10                                       | 2.03    | 1.89    | 1.78    | 1.70    | 2.15    | 2.40    |
| B22          | 1.58                                       | 1.49    | 1.38    | 1.25    | 1.25    | 1.78    | 2.06    |
| B23          | 1.34                                       | 1.36    | 1.29    | 1.17    | 1.10    | 1.66    | 1.88    |

TABLE S2: TCE and cDCE concentrations in the ground water wells

| Well - Label | TCE [ $\mu\text{g/L}$ ] |         | cDCE [ $\mu\text{g/L}$ ] |         |
|--------------|-------------------------|---------|--------------------------|---------|
|              | 03/2007                 | 03/2008 | 03/2007                  | 03/2008 |
| B17          | 0.10                    | nd      | 0.30                     | nd      |
| B18          | 70412                   | 26700   | 6985                     | 5613    |
| B19          | nd                      | nd      | nd                       | nd      |
| B20          | 112123                  | 115574  | 7403                     | 5465    |
| B21          | 63088                   | 75501   | 9404                     | 11054   |
| B22          | 152099                  | 149723  | 21708                    | 19816   |
| B23          | 22.2                    | nd      | 6.9                      | 3.2     |

TABLE S3: Summary of sampling data for the trees used in the study

| Label | Tree            | Perimeter<br>in cm* | Date                | Time        | Weather                       | Sample     | Motive                |
|-------|-----------------|---------------------|---------------------|-------------|-------------------------------|------------|-----------------------|
| 01    | Betula alba     | 149                 | 07/19/07 ; 03/20/08 | - / 13:30   | 28°C, dry / 6°C, dry          | Core / Sap | Radial Differences    |
| 02    | Betula alba     | 150                 | 07/19/07            | -           | 28°C, dry                     | Core       | Radial Differences    |
| 03    | Betula alba     | 98                  | 07/19/07            | -           | 28°C, dry                     | Core       | Radial Differences    |
| 04    | Betula alba     | 165                 | 07/12 - 07/19/07    | daily 12:00 | described**                   | Core       | Weather Change        |
| 05    | Betula alba     | 90                  | 04/10/08            | 13:30       | 7°C, rainy                    | Sap        | Radial Differences    |
| 06    | Betula alba     | 103                 | 04/04/08            | 18:00       | 13°C, dry                     | Sap        | Radial Differences    |
| 07    | Salix alba      | 110                 | 05/22/08            | 15:00       | 21°C, dry<br>slightly clouded | Core       | Radial Differences    |
| 08    | Salix alba      | 150                 | 05/29/08            | 14:00       | 26°C, dry, sunny              | Core       | Radial Differences    |
| 09    | Populus tremula | 85                  |                     | 14:30       |                               | Core       | Radial Differences    |
| 10    | Salix alba      | 130                 | 06/05/08            | 14:00       | 25°C, dry<br>sunny            | Core       | Radial Differences    |
| 11    | Salix alba      | 260                 |                     | 14:30       |                               | Core       | Radial Differences    |
| 12    | Salix alba      | 320                 |                     | 15:00       |                               | Core       | Radial Differences    |
| 13    | Quercus robur   | 70                  |                     | 15:30       |                               | Core       | Radial Differences    |
| 14    | Betula alba     | 75                  | 06/19/08            | 11:00       | 26°C, dry<br>slightly clouded | Core       | Radial Differences    |
| 15    | Betula alba     | 87                  |                     | 11:45       |                               | Core       | Radial Differences    |
| 16    | Malus spec.     | 56                  |                     | 12:15       |                               | Core       | Radial Differences    |
| 17    | Betula alba     | 110                 |                     | 13:00       |                               | Core       | Radial Differences    |
| 18    | Betula alba     | 105                 | 06/26/08            | 13:30       | 25°C, dry<br>clouded          | Core       | Radial Differences    |
| 19    | Betula alba     | 75                  |                     | 11:30       |                               | Core       | Radial Differences    |
| 20    | Salix alba      | 106                 |                     | 12:30       |                               | Core       | Radial Differences    |
| 21    | Salix alba      | 90                  |                     | 12:45       |                               | Core       | Radial Differences    |
| 22    | Salix alba      | 180                 |                     | 13:00       |                               | Core       | Radial Differences    |
| 23    | Salix alba      | 140                 |                     | 13:15       |                               | Core       | Radial Differences    |
| 24    | Salix alba      | 198                 | 07/10/08            | 14:00       | 18°C, dry                     | Core       | Radial Differences*** |
| 25    | Salix alba      | 88                  |                     | 15:00       | clouded                       | Core       | Radial Differences*** |

\* 50 cm above ground    \*\* see text    \*\*\* five samples from four directions

**Solid-Phase-Microextraction (SPME).** Temperature and time series were recorded under otherwise constant parameters to determine the best conditions for measurement using SPME. Optimization also included static headspace analysis. It emerged that the optimal temperature for TCE and cDCE measurement by SPME with the carboxen/ PDMS fiber was probably lower than the minimum agitator setting of 30°C. Because of high temperature variations in the laboratory, measurements were nevertheless made at 35°C. In general, cDCE und TCE behave similarly with respect to measurement parameters. It was therefore possible to set the best possible measurement conditions simultaneously for both analytes. The extraction conditions are summarized in Table 2.

TABLE S4: SPME measurement conditions

| Step                                         | Temperature | Time   |
|----------------------------------------------|-------------|--------|
| Fiber bake out before series of measurements | 300 °C      | 90 min |
| Conditioning of the sample                   | 35 °C       | 30 min |
| Fiber bake out between each measurement      | 300 °C      | 15 min |
| Extraction                                   | 35 °C       | 30 min |
| Desorption at injector                       | 250 °C      | 1 min  |

**GC/MS measurements.** GC separations were performed using a DB624 column or GS-Gaspro column (GC-System: HP 6980). The EPA Standard 624 Calibration Mix A (Supelco) was purchased, and spiked additionally with cDCE for calibration. Measurements were made partly in scan mode and partly in Selected Ion Monitoring (SIM) mode. Therefore a time window was defined for each substance using

its retention time, within which the two most intense mass to charge ratios were measured with the mass spectrometer (Agilent 5973) in electron impact mode. Peak areas were measured for both of these masses, also when scan mode was used. The relation of the main mass (Quantifier) to the second mass (Qualifier) was used in SIM mode, along with the retention time, to identify the substances.

**Calibration and Applicability.** Aqueous samples were used for calibration to estimate the tree core concentrations. The results of the calibration for TCE und cDCE are given in Table 1. Directly comparing concentrations in tree cores and in aqueous samples is arguable, because there is a basic lack of a meaningful relation for stating concentration or content. Nevertheless, for unified sampling, semi-quantitative assessments related to different parameters, e.g. tree core volume or dry weight, deliver almost identical results.

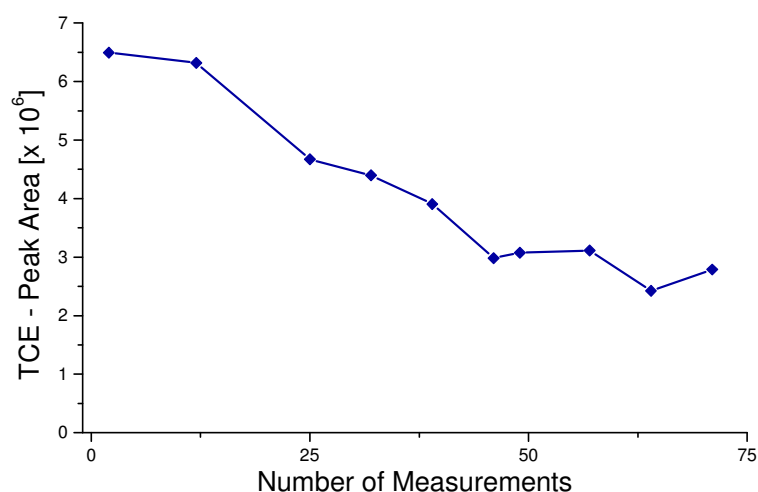

FIGURE S4: Measured sensitivity loss of a Carboxen<sup>TM</sup>/ PDMS-fiber on the basis of TCE standards in aqueous solution

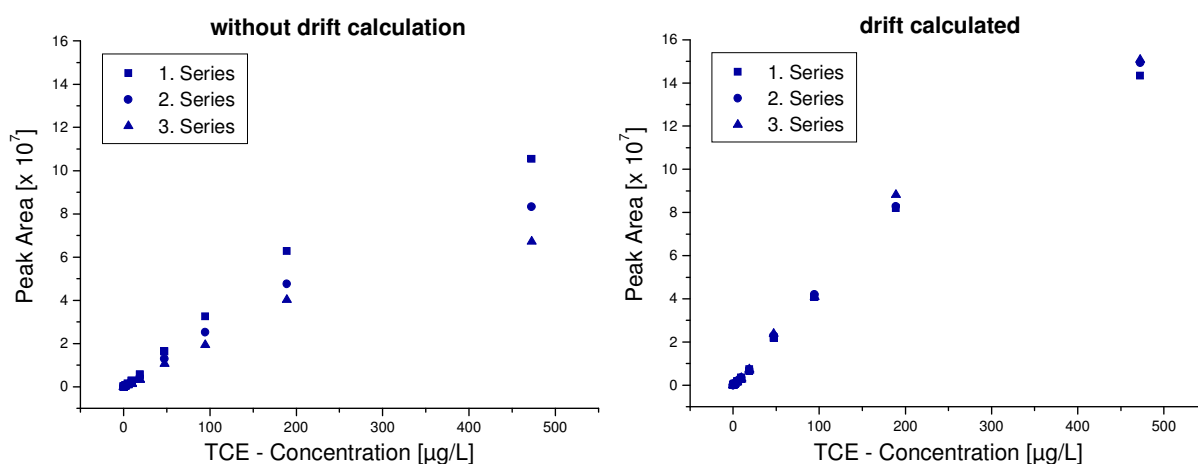

FIGURE S5: TCE calibration data without drift calculation (left) and drift calculated (right)

TABLE S5: Maximum concentrations in sap samples and in tree core samples for the trees used in this study; nd – not detected

| Label | Tree            | Sap - Max. Concentration $\mu\text{g/L}$ |      | Tree Core - Max. Concentration $\mu\text{g/kg}$ |       |
|-------|-----------------|------------------------------------------|------|-------------------------------------------------|-------|
|       |                 | TCE                                      | cDCE | TCE                                             | cDCE  |
| 01    | Betula alba     | 3.12                                     | 0.52 | 155                                             | 54.2  |
| 02    | Betula alba     |                                          |      | 66.1                                            | 0.31  |
| 03    | Betula alba     |                                          |      | 91.4                                            | 0.56  |
| 04    | Betula alba     |                                          |      | 2730                                            | 14.4  |
| 05    | Betula alba     | 46.7                                     | 0.22 |                                                 |       |
| 06    | Betula alba     | 0.18                                     | 0.01 |                                                 |       |
| 07    | Salix alba      |                                          |      | 841                                             | 1419  |
| 08    | Salix alba      |                                          |      | 3.7                                             | 3.11  |
| 09    | Populus tremula |                                          |      | 2059                                            | 43.2  |
| 10    | Salix alba      |                                          |      | 0.17                                            | 9.75  |
| 11    | Salix alba      |                                          |      | 20.9                                            | 43040 |
| 12    | Salix alba      |                                          |      | 10.5                                            | 9261  |
| 13    | Quercus robur   |                                          |      | 37.1                                            | nd    |
| 14    | Betula alba     |                                          |      | 14.4                                            | nd    |
| 15    | Betula alba     |                                          |      | 0.31                                            | nd    |
| 16    | Malus spec.     |                                          |      | 0.78                                            | 1.09  |
| 17    | Betula alba     |                                          |      | 661                                             | 0.06  |
| 18    | Betula alba     |                                          |      | 21.5                                            | 0.26  |
| 19    | Betula alba     |                                          |      | 4181                                            | 0.44  |
| 20    | Salix alba      |                                          |      | 1.77                                            | 721   |
| 21    | Salix alba      |                                          |      | 5.67                                            | 2698  |
| 22    | Salix alba      |                                          |      | 55.2                                            | 14497 |
| 23    | Salix alba      |                                          |      | 11.1                                            | 4819  |
| 24    | Salix alba      |                                          |      | 32.8                                            | 11022 |
| 25    | Salix alba      |                                          |      | 21.8                                            | 24038 |

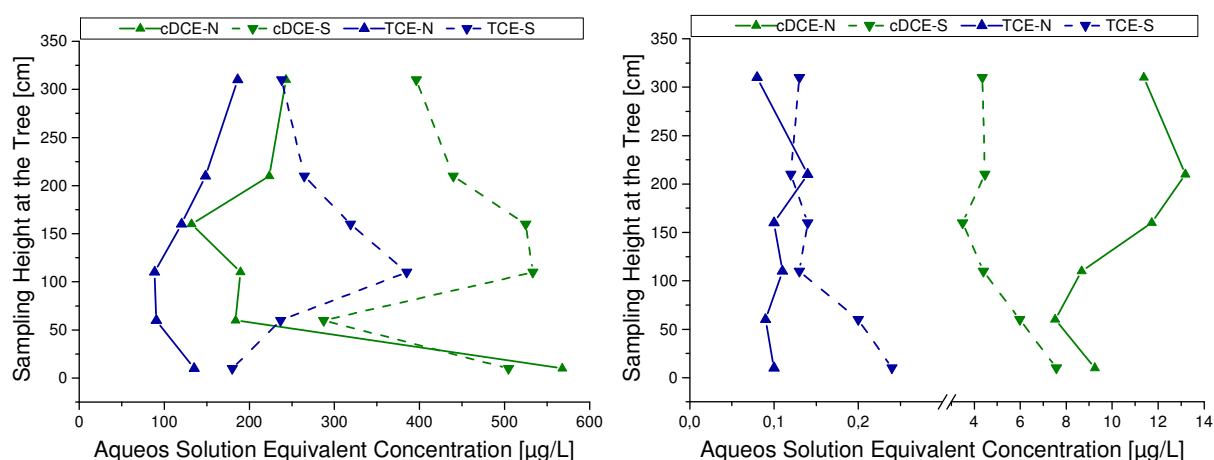

FIGURE S6: TCE and cDCE aqueous solution equivalent concentrations in tree cores depending on the sampling height from northside (continuous line) and from the southside (dashed line) of two different trees (left and right)

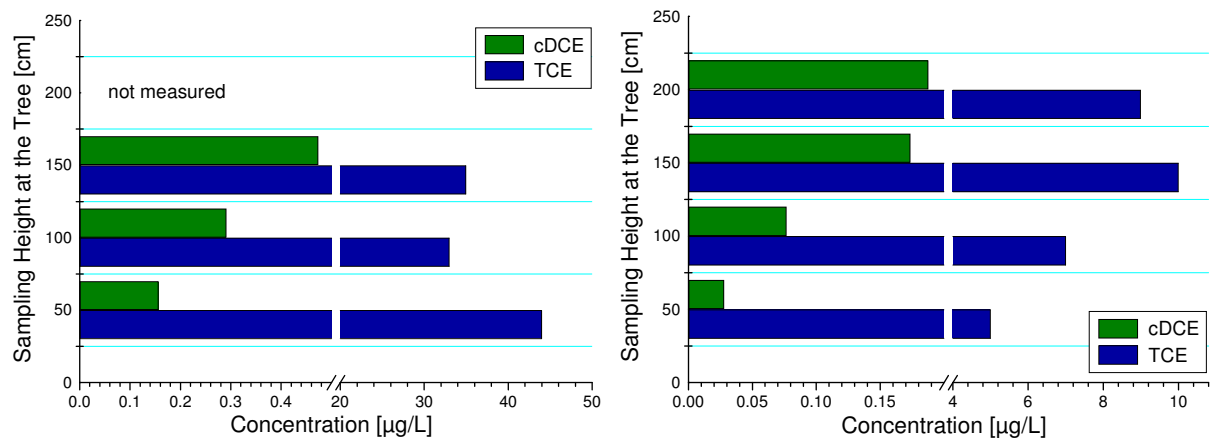

FIGURE S7: TCE and cDCE concentrations in sap depending on the sampling height from north side (left) and from the south side (right) of one birch tree

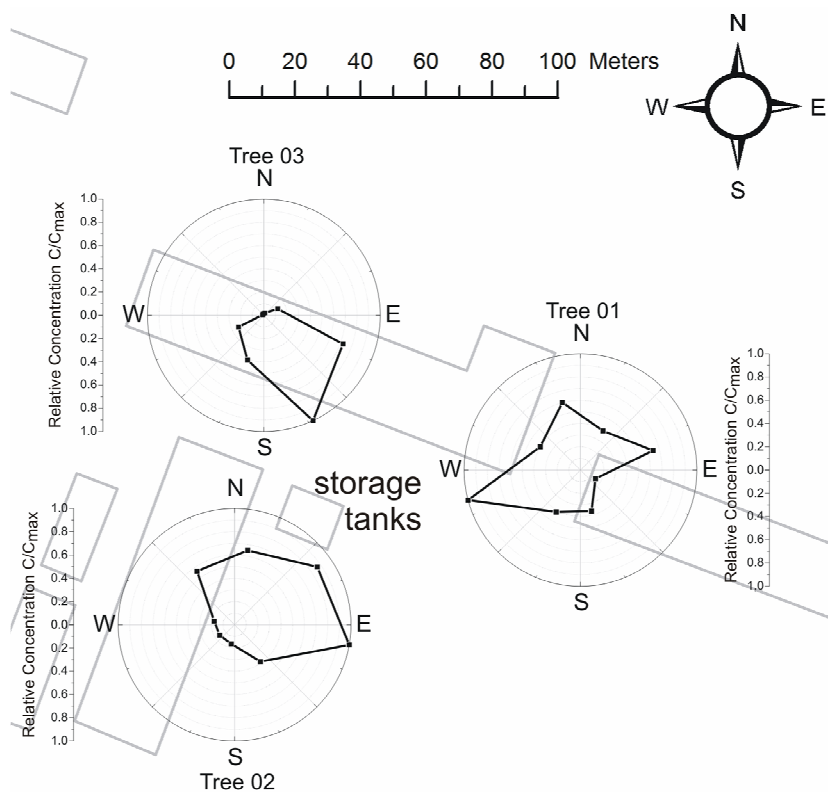

FIGURE S8: Relative concentrations related to the maximal value for the particular tree and positions of the trees from the radial sampling of tree cores 2007
